# Supplementary material for: Pharmacokinetic Models to Characterize the Absorption Phase and the Influence of a Proton Pump Inhibitor on the Overall Exposure of Dacomitinib
Source: MDPI journal article supplement (doi:10.3390/pharmaceutics12040330), 2020-04-07
Supplement: s1 [file s1]

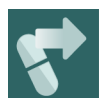

# Supplementary Materials: Pharmacokinetic Models to Characterize the Absorption Phase and the Influence of a Proton Pump Inhibitor on the Overall Exposure of Dacomitinib

Ana Ruiz-Garcia, Weiwei Tan, Jerry Li, May Haughey, Joanna Masters, Jennifer Hibma, Swan Lin

**Table S1.** Dacomitinib Absorption Models: Base Structural Model Objective Function Value and Condition Number.

| Model                                              | df | Objective Function Value | Condition Number |
|----------------------------------------------------|----|--------------------------|------------------|
| First-order absorption, without Lag Time           | 4  | -1223.307                | 1108.33          |
| First-order absorption, with Lag Time              | 5  | -1596.383                | 944.88           |
| Transit Compartment                                | 5  | -1889.846                | 195.61           |
| Order-zero and first-order absorption Model        | 6  | -1607.126                | 231.68           |
| Order-zero and first-order linked absorption Model | 5  | -1480.944                | 199.57           |

df: degrees of freedom calculated as number of parameters-1.

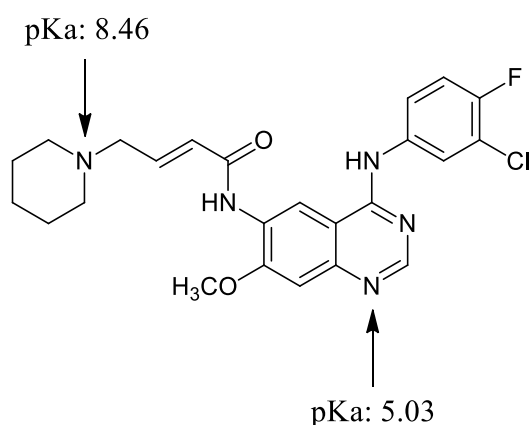

**Figure S1.** Assignment of pKa to the Dacomitinib Structure.
